# Supplementary material
Source: PubMed Central journal article supplement (PMC8491074)
Supplement: kiab283_supplementary_data.pdf [file kiab283_supplementary_data.pdf]

1

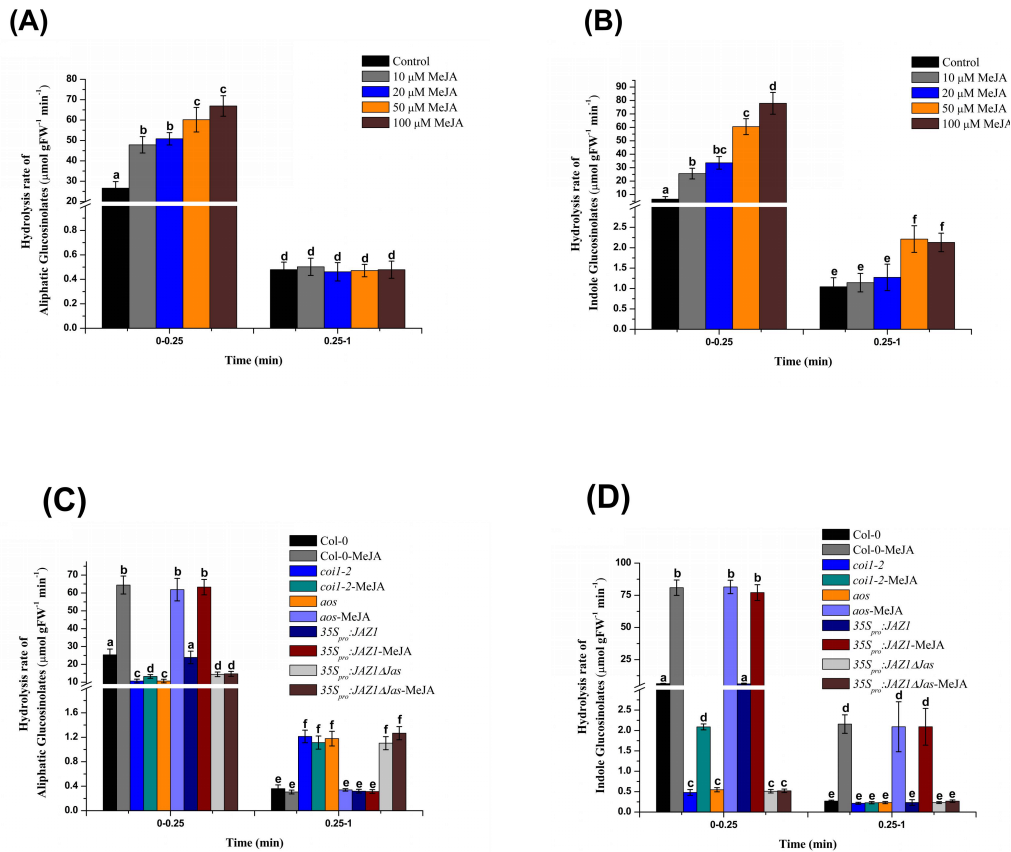

2 **Supplemental Figure S1.** The JA signal positively regulates the hydrolysis rate of  
 3 glucosinolates.

4 (A) and (B) Hydrolysis rate of aliphatic glucosinolates (A) and indole glucosinolates  
 5 (B) at different times after different concentrations of MeJA pretreatment for 72 h.  
 6 (C) and (D) Hydrolysis rate of aliphatic glucosinolates (C) and indole glucosinolates  
 7 (D) at different times of 21-old-day seedlings of different genetic materials of JA  
 8 synthesis and signal molecules after 100 µM of MeJA pretreatment for 72 h.

9 A-D, seedlings of 21-day-old plants were crushed in water to allow a breakdown of  
 10 glucosinolates by myrosinase. Myrosinase activity was stopped by heat inactivation at  
 11 the indicated time points and the remaining glucosinolates were extracted. For details  
 12 on calculating the hydrolysis rate of glucosinolate, see the method section. Values are  
 13 means ± SEM of eight independently grown plants. The experiments were repeated at  
 14 least three times with similar results. Different letters represent significant differences  
 15 ( $P < 0.05$ , Student's  $t$ -test).

16

17

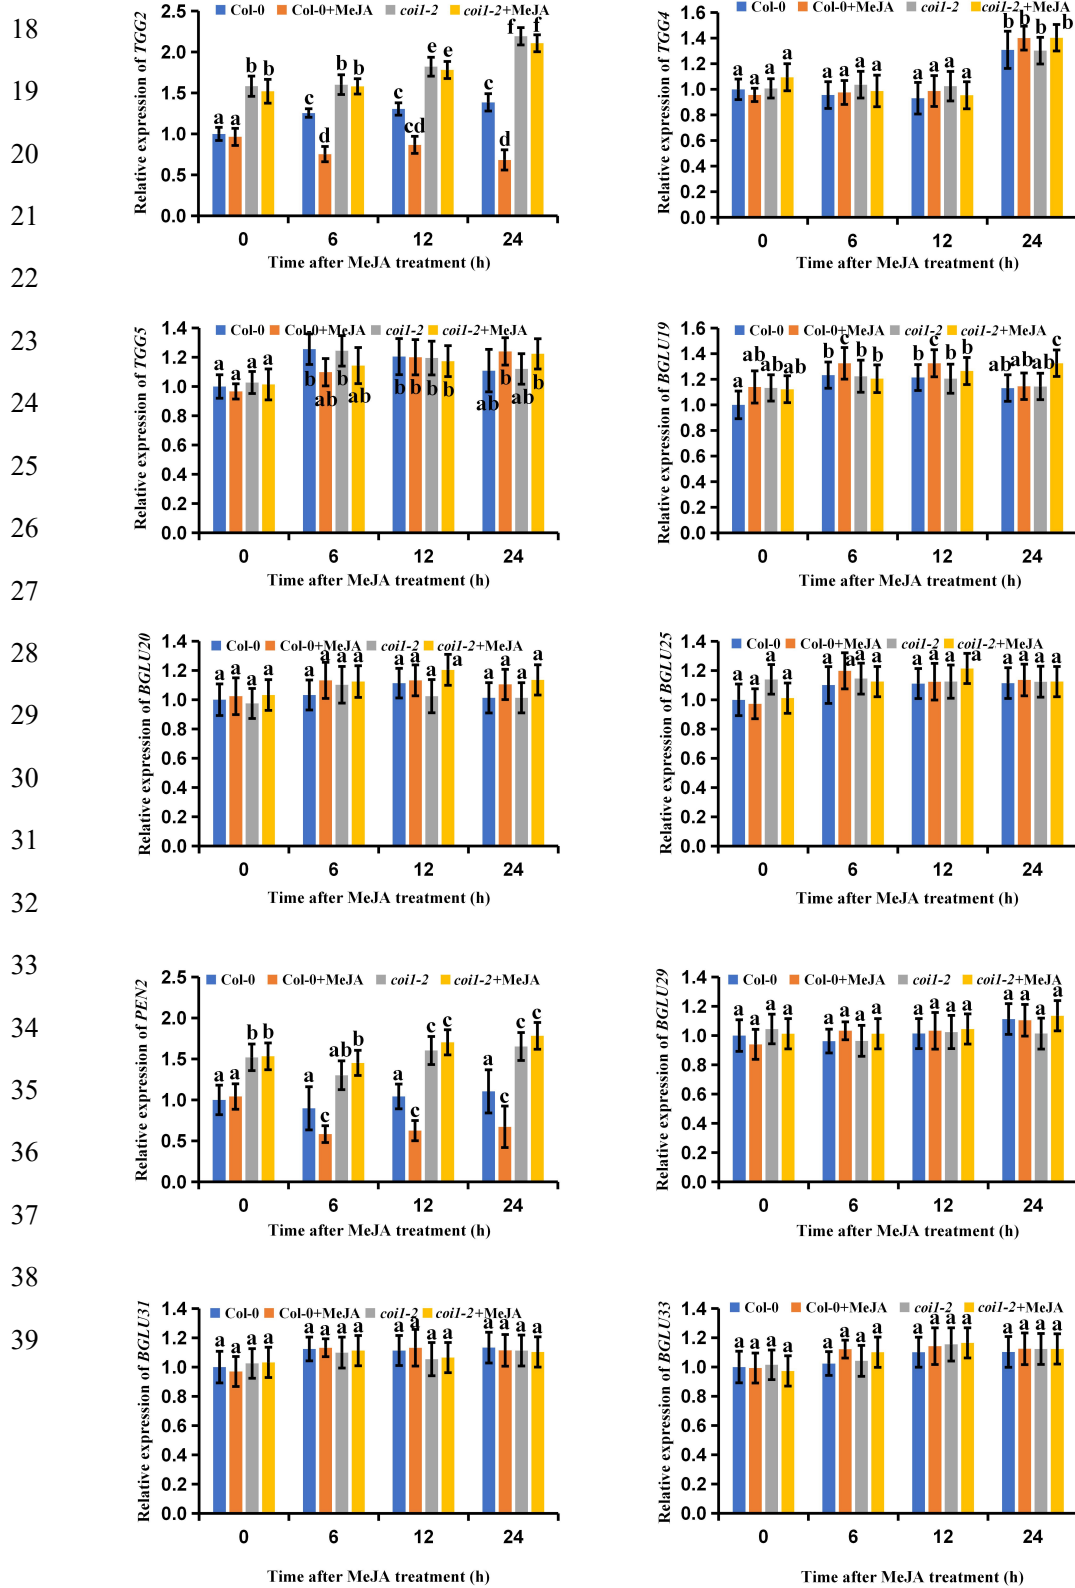

40 **Supplemental Figure S2.** Expression levels of JA-unaffected and -downregulated  
 41 myrosinase genes.

42 Expression levels of *TGG2*, *TGG4*, *TGG5*, *BGLU19*, *BGLU20*, *BGLU25*,  
 43 *BGLU29*, *BGLU31*, and *BGLU33* of 21-day-old seedlings of wild-type (Col-0) and

44 *coil-2* were treated with 100  $\mu$ M of MeJA for the indicated time periods. The treated  
45 plants were harvested for total RNA extraction and RT-qPCR assays. Means  $\pm$  SEM  
46 are relative values obtained from three technical replicates. Different letters represent  
47 significant differences ( $P < 0.05$ , Student's *t*-test).

48

49

50

51

52

53

54

55

56

57

58

59

60

61

62

63

64

65

66

67

68

69

70

71

72

73

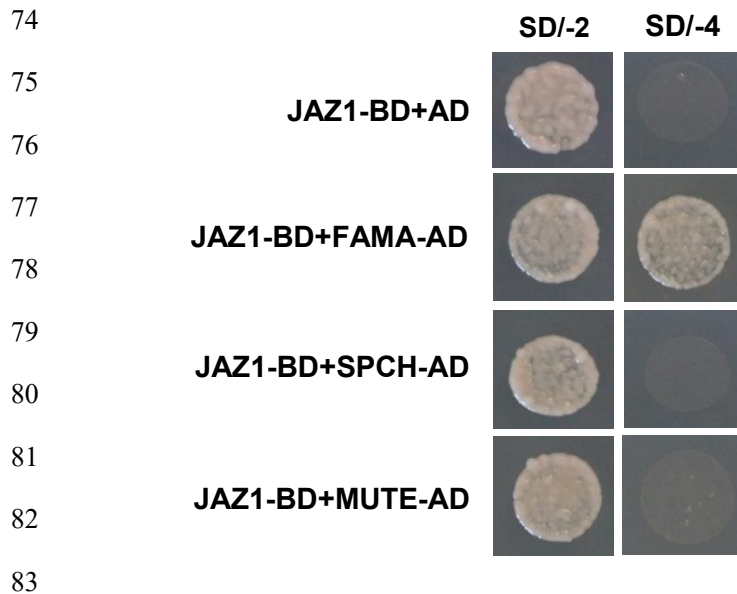

84 **Supplemental Figure S3.** JAZ1 did not interact with MUTE or SPCH.  
 85 Yeast cells cotransformed with pGADT7-FAMA, or pGADT7-MUTE, or  
 86 pGADT7-SPCH, or pGADT7-AP2 (preys) and pGBKT7-JAZ1-12 (bait) were grown  
 87 on yeast synthetic dropout lacking Leu and Trp (SD/-2) as transformation control or  
 88 on selective media lacking Ade, His, Leu, and Trp (SD/-4) to test protein interactions.  
 89  
 90

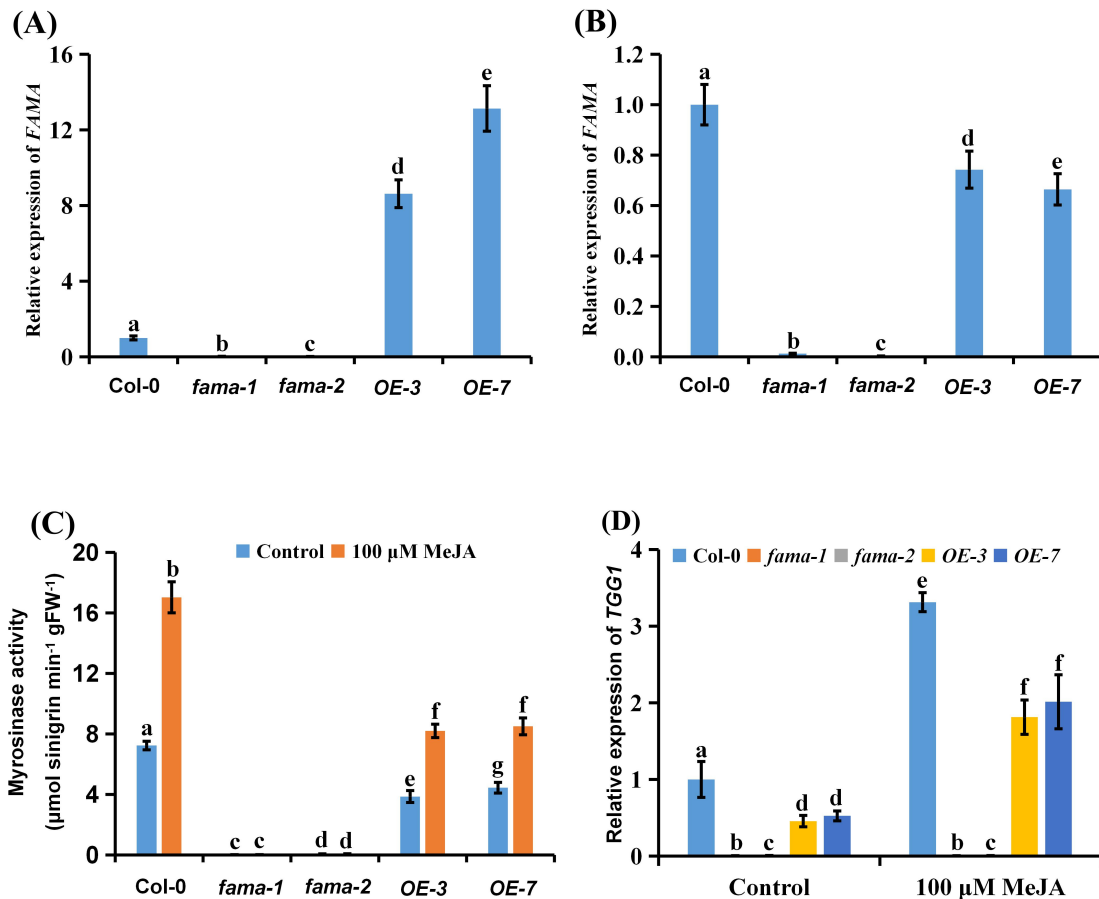

91 **Supplemental Figure S4.** The phenotypes of 21-day-old *FAMA* mutants and  
 92 overexpression plants in JA-regulated myrosinase activity.  
 93 (A) and (B) The expression levels of *FAMA* of five-day-old seedlings of indicated  
 94 genotypes (A) and *FAMA* of 21-day-old seedlings of indicated genotypes. Plants of  
 95 different growth stages were harvested for total RNA extraction and RT-qPCR assays.  
 96 Means  $\pm$  SEM are relative values obtained from three technical replicates; different  
 97 letters represent significant differences ( $P < 0.05$ , Student's *t*-test).  
 98 (C) and (D) Myrosinase activity (C) and expression levels of *TGG1* (D) of 21-day-old  
 99 seedlings of the indicated genotypes after treating with 100  $\mu\text{M}$  of MeJA for 24 h.  
 100 Values are means  $\pm$  SEM of 8 to 16 plants. The experiments were repeated at least  
 101 three times with similar results. Different letters represent significant differences ( $P <$   
 102 0.05, Student's *t*-test).

103  
 104

105

(A)

106

107

108

109

110

111

112

113

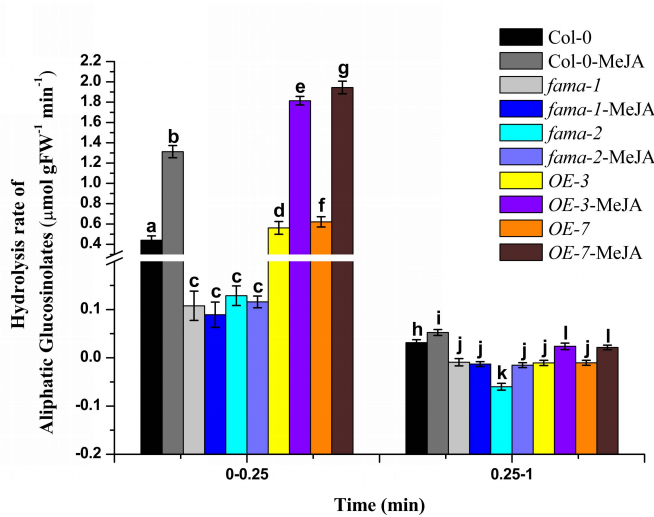

114

(B)

115

116

117

118

119

120

121

122

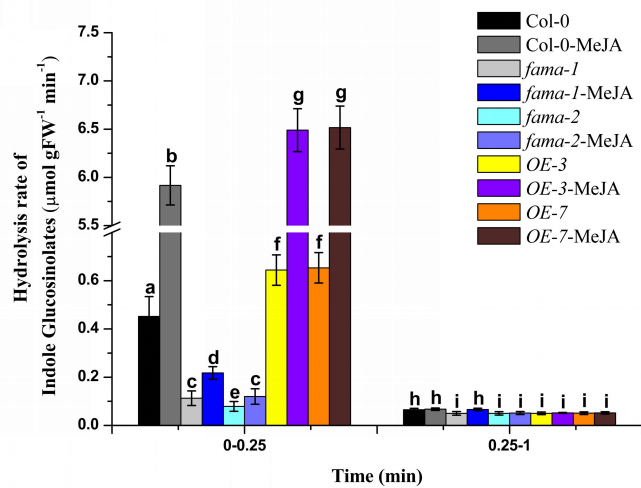

123

**Supplemental Figure S5. FAMA positively regulates the hydrolysis rate of**

124

glucosinolates.

125

(A) and (B) Hydrolysis rate of aliphatic glucosinolates (A) and indole glucosinolates

126

(B) at different times of five-old-day seedlings of indicated genetic plants after 100

127

μM of MeJA pretreatment for 72 h. Seedlings of five-day-old plants were crushed in

128

water to allow a breakdown of glucosinolates by myrosinase. Myrosinase activity was

129

stopped by heat inactivation at the indicated time points and the remaining

130

glucosinolates were extracted. For details on calculating the hydrolysis rate of

131

glucosinolate, see the method section. Values are means ± SEM of eight

132

independently grown plants. The experiments were repeated at least three times with

133

similar results. Different letters represent significant differences ( $P < 0.05$ , Student's

134

*t*-test).

135

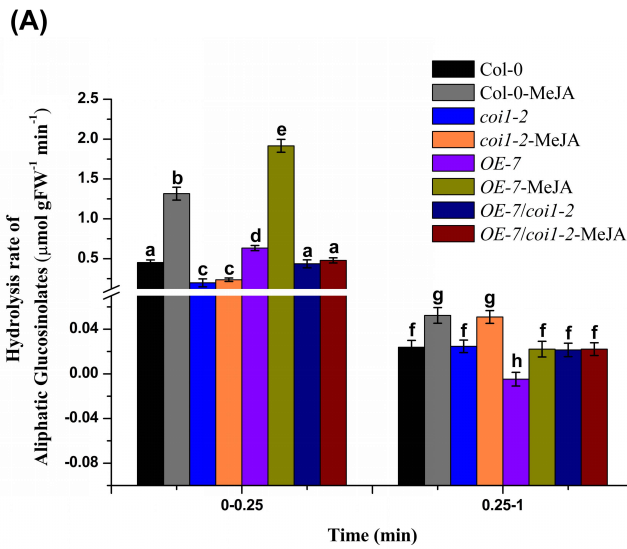

136

137

138

139

140

141

142

143

144

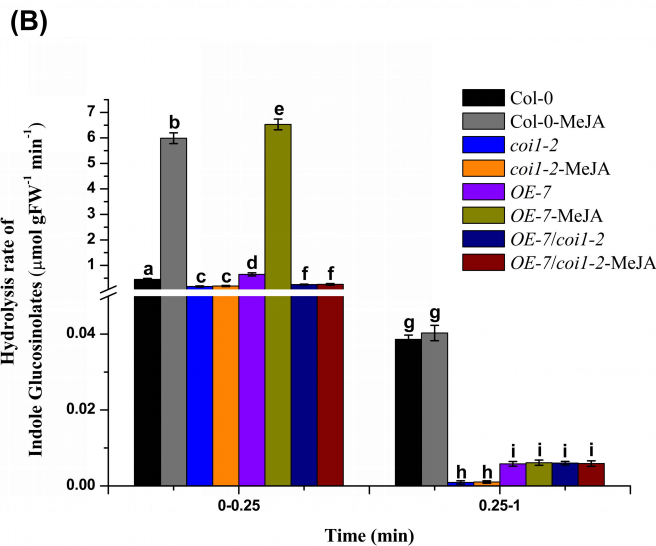

145

146

147

148

149

150

151

152

153

**Supplemental Figure S6.** Transgenic expression of *FAMA* rescues the reduced

154

hydrolysis rate of glucosinolates of *coi1-2* mutant.

155

(A) and (B) Hydrolysis rate of aliphatic glucosinolates (A) and indole glucosinolates

156

(B) at different times of five-old-day seedlings of indicated genetic plants after 100

157

$\mu$ M of MeJA pretreatment for 72 h. Seedlings of five-day-old plants were crushed in

158

water to allow a breakdown of glucosinolates by myrosinase. Myrosinase activity was

159

stopped by heat inactivation at the indicated time points and the remaining

160

glucosinolates were extracted. For details on calculating the hydrolysis rate of

161

glucosinolate, see the method section. Values are means  $\pm$  SEM of eight

162

independently grown plants. The experiments were repeated at least three times with

163

similar results. Different letters represent significant differences ( $P < 0.05$ , Student's

164

*t*-test).

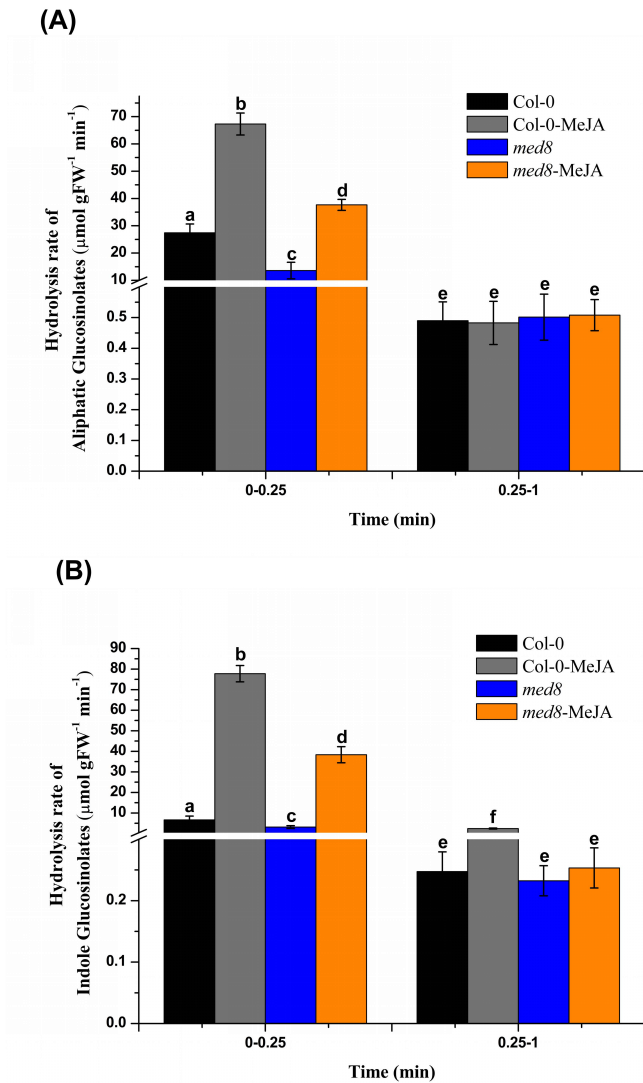

165

166 **Supplemental Figure S7.** MED8 positively regulates the hydrolysis rate of

167 glucosinolates.

168 (A) and (B) Hydrolysis rate of aliphatic glucosinolates (A) and indole glucosinolates

169 (B) at different times of 21-old-day seedlings of indicated genetic plants after 100  $\mu$ M

170 of MeJA pretreatment for 72 h. Seedlings of 21-day-old plants were crushed in water

171 to allow a breakdown of glucosinolates by myrosinase. Myrosinase activity was

172 stopped by heat inactivation at the indicated time points and the remaining

173 glucosinolates were extracted. For details on calculating the hydrolysis rate of

174 glucosinolate, see the method section. Values are means  $\pm$  SEM of eight

175 independently grown plants. The experiments were repeated at least three times with

176 similar results. Different letters represent significant differences ( $P < 0.05$ , Student's

177 *t*-test).



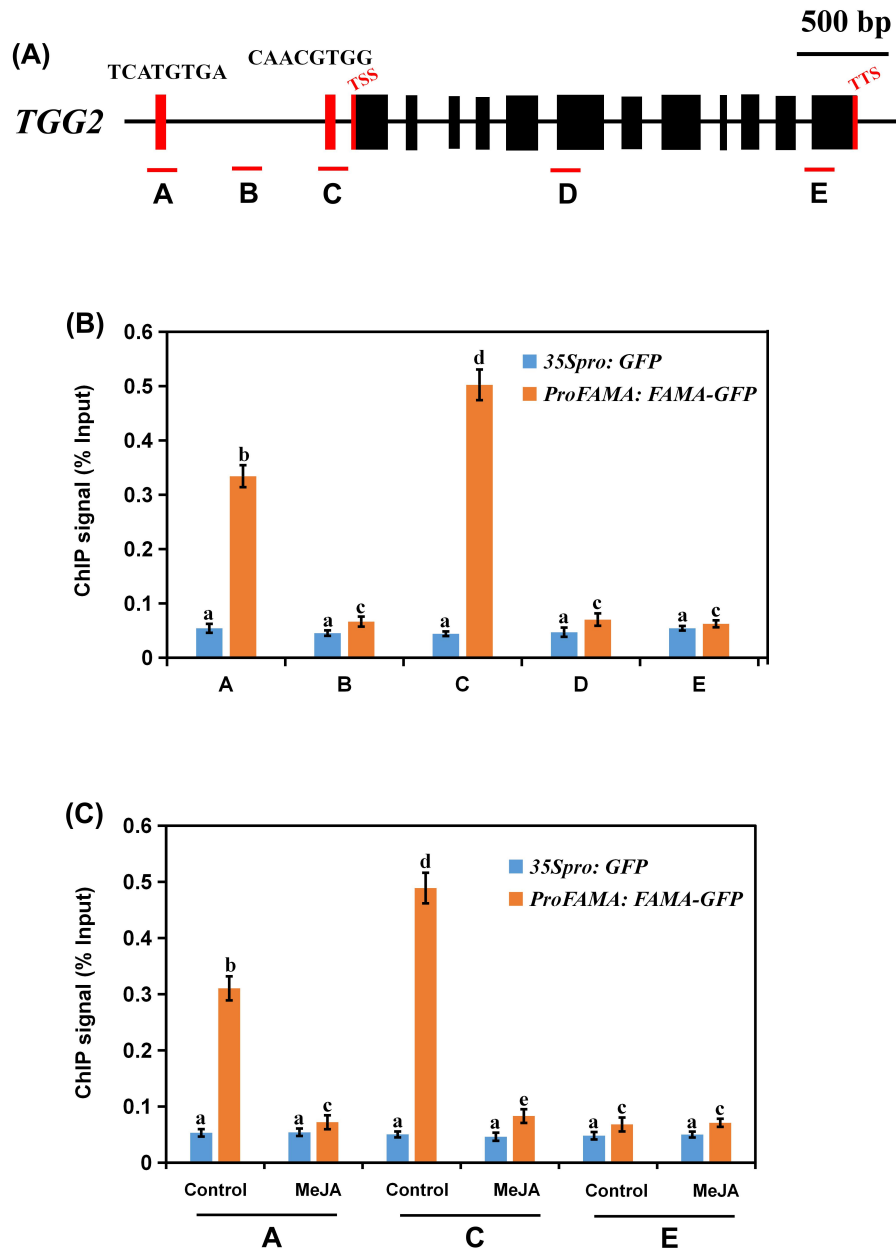

178

179 **Supplemental Figure S8.** JA repressed the occupation of FAMA on the G-box like  
 180 region in the promoter of *TGG2*.

181 (A) Schematic diagram of *TGG2* indicating the amplicons and probe used for the  
 182 ChIP-qPCR assay. Positions of the transcription start site (TSS) and transcription  
 183 termination site (TTS) are indicated with thin red bars.

184 (B) ChIP-qPCR assays showing that FAMA associates with the *TGG2* locus. The  
 185 chromatin of transgenic plants expressing *ProFAMA: FAMA-GFP* or *35S<sub>pro</sub>: GFP* was  
 186 immunoprecipitated with an anti-GFP antibody, and *35S<sub>pro</sub>: GFP* plants served as  
 187 control. Immunoprecipitated chromatin was analyzed by RT-qPCR using primers

188 corresponding to the amplicons represented by the schematic diagram of *TGG2* (A).  
189 ChIP signal was displayed as the percentage of total input DNA. Means  $\pm$  SEM are  
190 relative values obtained from three technical replicates; different letters represent  
191 significant differences ( $P < 0.05$ , Student's *t*-test).

192 (C) Dynamic recruitment of FAMA to the *TGG2* locus. ChIP assays were performed  
193 as in (B), except that *ProFAMA: FAMA-GFP* and *35S<sub>pro</sub>: GFP* plants were treated  
194 with 100  $\mu$ M of MeJA for 30 min before cross-linking. Means  $\pm$  SEM are relative  
195 values obtained from three technical replicates; different letters represent significant  
196 differences ( $P < 0.05$ , Student's *t*-test).

197

198

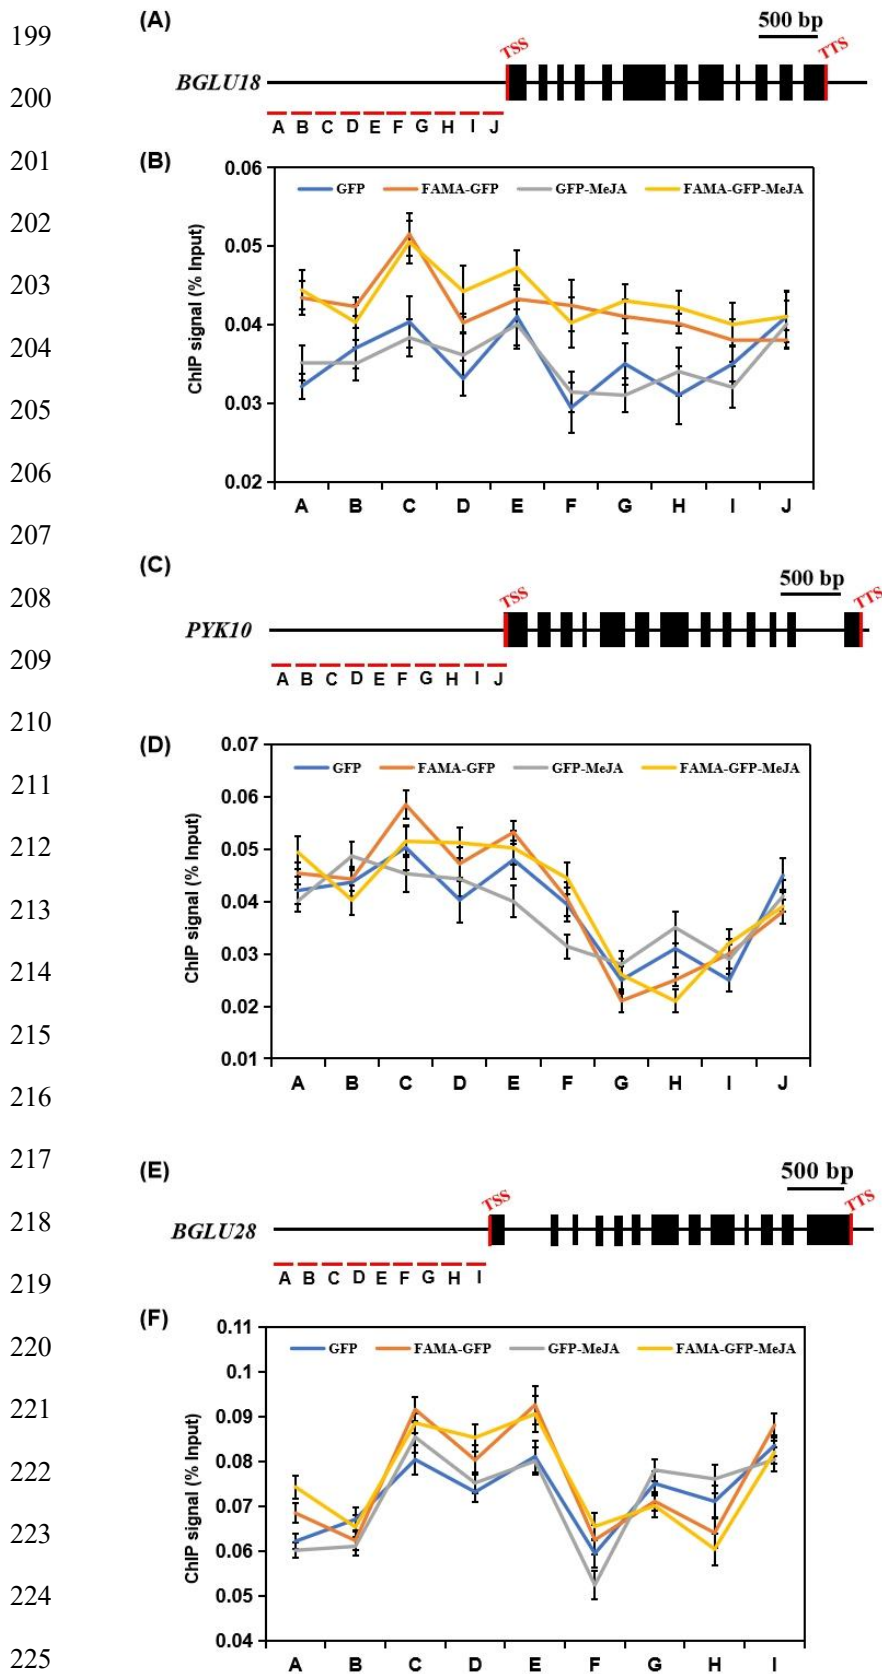

226 **Supplemental Figure S9.** FAMA did not bind the promoters of *BGLU18*, *PYK10*, or  
 227 *BGLU28*.

228 (A) Schematic diagram of *BGLU18* indicating the amplicons and probe used for the

229 ChIP-qPCR assay. Positions of the transcription start site (TSS) and transcription  
230 termination site (TTS) are indicated with thin red bars.

231 (B) ChIP-qPCR assays showing that FAMA does not associate with the *BGLU18*  
232 locus. *ProFAMA: FAMA-GFP* and *35S<sub>pro</sub>: GFP* plants were first treated with 100  $\mu$ M  
233 of MeJA for 30 min, and then the chromatins of the treated plants were  
234 immunoprecipitated with an anti-GFP antibody, and *35S<sub>pro</sub>: GFP* plants served as  
235 control. Immunoprecipitated chromatin was analyzed by RT-qPCR using primers  
236 corresponding to the amplicons represented by the schematic diagram of *BGLU18*  
237 (A). ChIP signal was displayed as the percentage of total input DNA. Means  $\pm$  SEM  
238 are relative values obtained from three technical replicates.

239 (C) Schematic diagram of *PYK10* indicating the amplicons and probe used for the  
240 ChIP-qPCR assay. Positions of the transcription start site (TSS) and transcription  
241 termination site (TTS) are indicated with thin red bars.

242 (D) ChIP-qPCR assays showing that FAMA does not associate with the *PYK10* locus.  
243 *ProFAMA: FAMA-GFP* and *35S<sub>pro</sub>: GFP* plants were first treated with 100  $\mu$ M of  
244 MeJA for 30 min, and then the chromatins of the treated plants were  
245 immunoprecipitated with an anti-GFP antibody, and *35S<sub>pro</sub>: GFP* plants served as  
246 control. Immunoprecipitated chromatin was analyzed by RT-qPCR using primers  
247 corresponding to the amplicons represented by the schematic diagram of *PYK10* (A).  
248 ChIP signal was displayed as the percentage of total input DNA. Means  $\pm$  SEM are  
249 relative values obtained from three technical replicates.

250 (E) Schematic diagram of *BGLU28* indicating the amplicons and probe used for the  
251 ChIP-qPCR assay. Positions of the transcription start site (TSS) and transcription  
252 termination site (TTS) are indicated with thin red bars.

253 (F) ChIP-qPCR assays showing that FAMA does not associate with the *BGLU28*  
254 locus. *ProFAMA: FAMA-GFP* and *35S<sub>pro</sub>: GFP* plants were first treated with 100  $\mu$ M  
255 of MeJA for 30 min, and then the chromatins of the treated plants were  
256 immunoprecipitated with an anti-GFP antibody, and *35S<sub>pro</sub>: GFP* plants served as  
257 control. Immunoprecipitated chromatin was analyzed by RT-qPCR using primers  
258 corresponding to the amplicons represented by the schematic diagram of *BGLU28*

259 (A). ChIP signal was displayed as the percentage of total input DNA. Means  $\pm$  SEM  
260 are relative values obtained from three technical replicates.  
261  
262

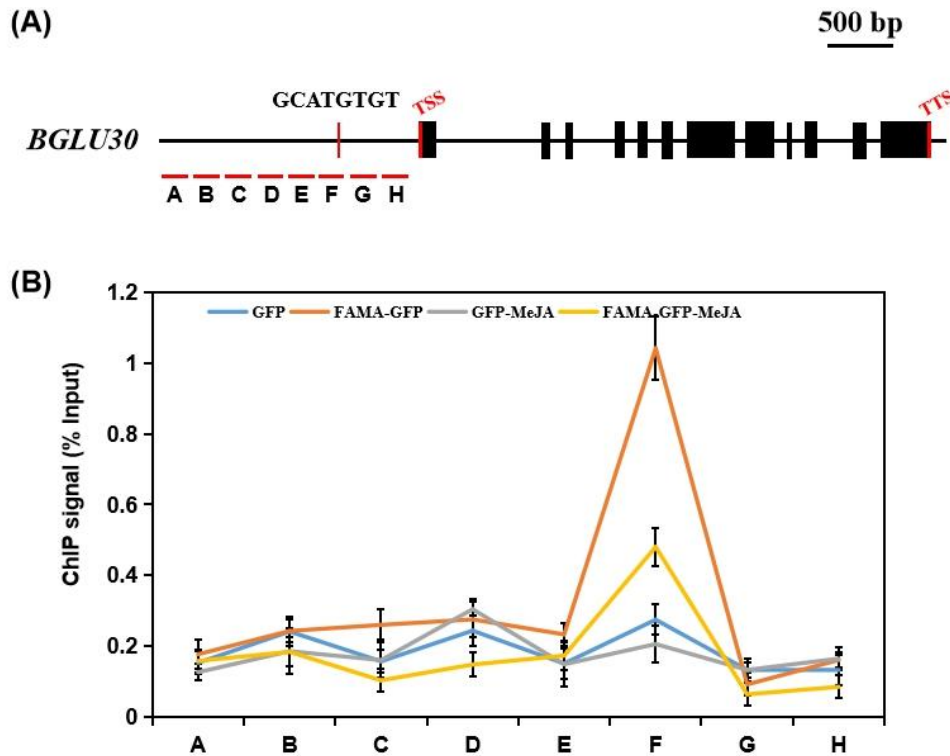

263

264 **Supplemental Figure S10.** FAMA bound the promoters of *BGLU30*.

265 (A) Schematic diagram of *BGLU30* indicating the amplicons and probe used for the  
 266 ChIP-qPCR assay. Positions of the transcription start site (TSS) and transcription  
 267 termination site (TTS) are indicated with thin red bars.

268 (B) ChIP-qPCR assays showing that FAMA associates with the *BGLU30* locus.

269 *ProFAMA*: *FAMA-GFP* and *35S<sub>pro</sub>: GFP* plants were first treated with 100  $\mu$ M of  
 270 MeJA for 30 min, and then the chromatin of the treated plants were

271 immunoprecipitated with an anti-GFP antibody, and *35S<sub>pro</sub>: GFP* plants served as  
 272 control. Immunoprecipitated chromatin was analyzed by RT-qPCR using primers

273 corresponding to the amplicons represented by the schematic diagram of *BGLU30*

274 (A). ChIP signal was displayed as the percentage of total input DNA. Means  $\pm$  SEM  
 275 are relative values obtained from three technical replicates.

276

277

278 **Supplemental Table S1.** Primers used in this study.

| Primer name | Sequence (5'-3')        | Purpose         |
|-------------|-------------------------|-----------------|
| TGG1-RT-F   | CGTTGATGTTTACAGGACGAAA  | Gene expression |
| TGG1-RT-R   | CAGTTGCATCTTTGCTCTCTTG  |                 |
| TGG2-RT-F   | TGGCAGAAAGATCTAGACGTGA  |                 |
| TGG2-RT-R   | TTCCTTTTGGGAAGGATTCTTGA |                 |
| TGG4-RT-F   | TCCCCAAACTTTAGAAGACGAA  |                 |
| TGG4-RT-R   | GTTGCAAGAGAGAAAGGCTGAT  |                 |
| TGG5-RT-F   | ACGCTGAGCTTCTATTCCAAAG  |                 |
| TGG5-RT-R   | CCAGAATCTCCTCCAAGTTCAC  |                 |
| BGLU18-RT-F | GGGACACAAGATCACAACAGAA  |                 |
| BGLU18-RT-R | CCACTCAAAGTTGTCCATCAAA  |                 |
| BGLU19-RT-F | CTGTGGGACATCTACACCAAGA  |                 |
| BGLU19-RT-R | CCATCAGTGTTTCACTTTTCA   |                 |
| BGLU20-RT-F | GTTTTTCACTGGGACACTCCTC  |                 |
| BGLU20-RT-R | TGATCCAATGCTTCACTTTGTC  |                 |
| PYK10-RT-F  | ATACGCAAATCCGGAAATTATG  |                 |
| PYK10-RT-R  | TTATGATCAGCGGTACCAACAG  |                 |
| BGLU21-RT-F | CTCAATCGCATGGTCAAGAATA  |                 |
| BGLU21-RT-R | ATCGATGAGCTCGTGGTAGAAT  |                 |
| BGLU22-RT-F | CTCAATCGCATGGTCAAGAATA  |                 |
| BGLU22-RT-R | CAGGTCGTGGTAGAATTTTACA  |                 |
| BGLU24-RT-F | ACTTTGAGTGGCAAGATGGTTT  |                 |
| BGLU24-RT-R | CTCATGACGTGTGAGGTTGTTT  |                 |
| BGLU25-RT-F | TCAAAGTCCAATGTGGTTTGAG  |                 |
| BGLU25-RT-R | CCTGAGGGTAATCTCCATGTGT  |                 |
| PEN2-RT-F   | TCGCTTTTTCGTGAAGAGTATCA |                 |
| PEN2-RT-R   | TCCACTCTGATCCTCCTTGTTT  |                 |
| BGLU27-RT-F | CTTGGCCTAGGATTTTTCCTCT  |                 |
| BGLU27-RT-R | GCGAGAGGTGTTATCCGTTAG   |                 |
| BGLU28-RT-F | TTCCCGATAATTTGTTTTTGG   |                 |
| BGLU28-RT-R | GGTTCTTTCTGGAAAAGTGTGG  |                 |
| BGLU29-RT-F | AAATCGCAGTAACCACGAAACT  |                 |
| BGLU29-RT-R | AGAACTCTTCGCAAACCTTCTG  |                 |
| BGLU30-RT-F | TACCCAGTGGAAAGCTAAAGGA  |                 |
| BGLU30-RT-R | ATGATAGAGCGTCATCGAAGGT  |                 |
| BGLU31-RT-F | GGGTCGATGTTCTAAATGGGTA  |                 |
| BGLU31-RT-R | TTTCTGAACTCTTCAACAGCA   |                 |
| BGLU32-RT-F | AATGGATCAGTGACACGTGAAG  |                 |

|                             |                                            |     |
|-----------------------------|--------------------------------------------|-----|
| BGLU32-RT-R                 | ATCCAACAATGACCATGTGAAA                     |     |
| BGLU33-RT-F                 | CAAATTCTTGCTCATCTTGCTG                     |     |
| BGLU33-RT-R                 | ACGTCTTCACTCGAATTTGGAT                     |     |
| FAMA-RT-F                   | GGTGAAGAGCAAGAGGAAGAGA                     |     |
| FAMA-RT-R                   | AGCCAGGCATGAGAGATCTAAG                     |     |
| ACT7-RT-F                   | CCATTCAGGCCGTTCTTTC                        |     |
| ACT7-RT-R                   | CGTTCTGCGGTAGTGGTGA                        |     |
| pGADT7-FAMA-NdeI-F          | GGAATTCcatatgATGGATAAAGATTACT<br>CGGCAC    | Y2H |
| pGADT7-FAMA-BamHI-R         | CGCggatccTCAAGTAAACACAATATTT<br>CCC        |     |
| pGADT7-FAMA<br>head-NdeI-F  | GGAATTCcatatgATGGATAAAGATTACT<br>CGGCAC    |     |
| pGADT7-FAMA<br>head-BamHI-R | CGCggatccCCTTCTTCGCTGGTCTTG<br>C           |     |
| pGADT7-FAMA tail-NdeI-F     | GGAATTCcatatgATGGCAAGACCAGCG<br>AAGAAGTG   |     |
| pGADT7-FAMA<br>tail-BamHI-R | CGCggatccTCAAGTAAACACAATATTT<br>CCC        |     |
| pGADT7-MUTE-NdeI-F          | GGAATTCcatatgATGTCTCACATCGCTG<br>TTGAA     |     |
| pGADT7-MUTE-BamHI-R         | CGCggatccTTAATTGGTAGAGACGATC<br>AC         |     |
| pGADT7-SPCH-NdeI-F          | GGAATTCcatatgATGCAGGAGATAATA<br>CCGGAT     |     |
| pGADT7-SPCH-BamHI-R         | CGCggatccCTAGCAGAATGTTTGCTGA<br>AT         |     |
| pGBKT7-JAZI-EcoRI-F         | TCgaattcATGTCGAGTTCTATGGAAT                |     |
| pGBKT7-JAZI-SalI-R          | TTAgtcgacgTATTTTCAGCTGCTAAACCG             |     |
| pGBKT7-JAZ2-EcoRI-F         | GCgaattcATGTCGAGTTTTTCTGCCGAG<br>TGTTGGGA  |     |
| pGBKT7-JAZ2-SalI-R          | CTTgtcgacgCCGTGAACTGAGCCAAGCT<br>GGGTTA    |     |
| pGBKT7-JAZ3-EcoRI-F         | TCgaattcATGGAGAGAGATTTTCTCGGG              |     |
| pGBKT7-JAZ3-SalI-R          | TTAgtcgacgGGTTGCAGAGCTGAGAGA<br>AGAA       |     |
| pGBKT7-JAZ4-EcoRI-F         | GCgaattcATGGAGAGAGATTTTCTCGG<br>GCTGGGAT   |     |
| pGBKT7-JAZ4-SalI-R          | CTTgtcgacgGTGCAGATGATGAGCTGG<br>AGGACA     |     |
| pGBKT7-JAZ5-EcoRI-F         | GCgaattcATGTCGTCGAGCAATGAAAA<br>TGCTAAGGCA |     |



|                         |                                          |          |
|-------------------------|------------------------------------------|----------|
| pGBKT7-JAZ5-SalI-R      | CTTgtcgacgTAGCCTTAGATCGAGATCT<br>TTCGA   |          |
| pGBKT7-JAZ6-EcoRI-F     | GCgaattcATGTCAACGGGACAAGCGCC<br>GGAGAAGT |          |
| pGBKT7-JAZ6-SalI-R      | CTTgtcgacgAAGCTTGAGTTCAAGGTTT<br>TTGGA   |          |
| pGBKT7-JAZ7-EcoRI-F     | gaattcATGATCATCATCAAAAACCTG<br>C         |          |
| pGBKT7-JAZ7-SalI-R      | CTTgtcgacgTCGGTAACGGTGGTAAGG<br>GGA      |          |
| pGBKT7-JAZ8-EcoRI-F     | GGgaattcATGAAGCTACAGCAAAATTG<br>TGAAGTA  |          |
| pGBKT7-JAZ8-PstI-R      | AAActgcaggTCGTGATGATGGTACGG<br>TGAAGTA   |          |
| pGBKT7-JAZ9-EcoRI-F     | gaattcATGGAAAGAGATTTTCTGGGTTT<br>G       |          |
| pGBKT7-JAZ9-SalI-R      | CTTgtcgacgTGTAGGAGAAGTAGAAGA<br>GTAATT   |          |
| pGBKT7-JAZI0-EcoRI-F    | GCgaattcATGTGCGAAAGCTACCATAGA<br>ACTCGA  |          |
| pGBKT7-JAZI0-SalI-R     | CTTgtcgacgGGCCGATGTGCGATAGTAA<br>GGA     |          |
| pGBKT7-JAZII-EcoRI-F    | GCgaattcATGGCTGAGGTAAACGGAGA<br>TTT      |          |
| pGBKT7-JAZII-SalI-R     | CTTgtcgacgTGTCACAATGGGGCTGGTT<br>TCA     |          |
| pGBKT7-JAZI2-EcoRI-F    | GGgaattcATGACTAAGGTGAAAGATGA<br>GCCA     |          |
| pGBKT7-JAZI2-SalI-R     | CTTgtcgacgAGCAGTTGGAAATTCCTCC<br>TT      |          |
| pGBKT7-JAZI Jas-EcoRI-F | TCgaattcATGCTTAGCCAAGAATCAAAC            |          |
| pGBKT7-JAZI Jas-SalI-R  | TTAgtcgacTATTTTCAGCTGCTAAACCG            |          |
| pGBKT7-JAZI NT-EcoRI-F  | TCgaattcATGTGCGAGTTCTATGGAAT             |          |
| pGBKT7-JAZI NT-SalI-R   | TTAgtcgacGGTGCAGTTTGAGACTCTG<br>G        |          |
| pGBKT7-JAZI ZIM-EcoRI-F | TCgaattcATGAGAGTCTCAAACCTGCACC           |          |
| pGBKT7-JAZI ZIM-SalI-R  | TTAgtcgacGCTATTAGCGGTGCCTTTGC            |          |
| ChIP-TGG1-A-F           | GGCTCGTGATGAATGGCAAAC                    | ChIP-PCR |
| ChIP-TGG1-A-R           | CATATTAGAAATATGATCAAG                    |          |
| ChIP-TGG1-B-F           | GGACAAGAAATCTATTTTTTTG                   |          |
| ChIP-TGG1-B-R           | GTTTTCAAATAGGTTCTTCTC                    |          |
| ChIP-TGG1-C-F           | CACATAAAATGATCAATTG                      |          |
|                         |                                          |          |

|                 |                        |
|-----------------|------------------------|
| ChIP-TGG1-C-R   | GAATCCCGTGGGATTGCTTAC  |
| ChIP-TGG1-D-F   | GGTTTGTGCGCTTGCATGGTTG |
| ChIP-TGG1-D-R   | GAGATTACTATGAATATATAG  |
| ChIP-TGG1-E-F   | CTTTATTTTCTCAGTTCAATG  |
| ChIP-TGG1-E-R   | CTCAGTGACATATATTAAGG   |
| ChIP-TGG1-F-F   | GATGCATGAAATATCCAATCC  |
| ChIP-TGG1-F-R   | CAATACATATGGTAGAAAAAG  |
| ChIP-TGG2-A-F   | TTGAAACGATTAAAAAGTGC   |
| ChIP-TGG2-A-R   | CACCGCTGACATCACATATC   |
| ChIP-TGG2-B-F   | CCAATCCAACCCAAATTGAC   |
| ChIP-TGG2-B-R   | GACAAAAATGTACGCGAAAT   |
| ChIP-TGG2-C-F   | GCTTGAGATAAAGAAATTTTC  |
| ChIP-TGG2-C-R   | GGGTTCACGTACACGTAATC   |
| ChIP-TGG2-D-F   | TGTGAAAGGTGCATGTGATG   |
| ChIP-TGG2-D-R   | CAGGTCCAATCTTCCCTCCT   |
| ChIP-TGG2-E-F   | CTTGCTCCATAGATAAAAGG   |
| ChIP-TGG2-E-R   | CCCCATCCCATGGCATAATG   |
| ChIP-BGLU18-A-F | TTACCAATTTAAAAACCTTAA  |
| ChIP-BGLU18-A-R | GTTACAAAGGCAATCTAGTC   |
| ChIP-BGLU18-B-F | TAAAAATGAAGGTGAGTTTTTG |
| ChIP-BGLU18-B-R | CTAAACCAAAAAAGCTGATC   |
| ChIP-BGLU18-C-F | ATTTAAAATCTTAAATTAATT  |
| ChIP-BGLU18-C-R | CTTATTGGCTTTCGTATTGCG  |
| ChIP-BGLU18-D-F | TGTTATAGTGCTTTTGCAATT  |
| ChIP-BGLU18-D-R | CTCTATTTCTCTACCACGAAA  |
| ChIP-BGLU18-E-F | TTTTGTTGAAAGCCAATGAC   |
| ChIP-BGLU18-E-R | ATCTTAATTTATTATATTATT  |
| ChIP-BGLU18-F-F | AACATAGATAAGTTTTTTTTTA |
| ChIP-BGLU18-F-R | CAATACGTAAATATATGAATG  |
| ChIP-BGLU18-G-F | AGTTTTTGATTAAATGTAAAT  |
| ChIP-BGLU18-G-R | CTTCACACTTTACTCTGCTTT  |
| ChIP-BGLU18-H-F | CTTGAAATGTGGATGGTGTG   |
| ChIP-BGLU18-H-R | CTTGCTGGTTGTAAAATTGC   |
| ChIP-BGLU18-I-F | AAATTCATTAAATAAAAGAT   |
| ChIP-BGLU18-I-R | GCATTAATTATCACACGAATA  |
| ChIP-BGLU18-J-F | TAATGTACTAAGTAGTACTA   |
| ChIP-BGLU18-J-R | TTTTCAATTTTCTTCCAAGTG  |
| ChIP-PYK10-A-F  | GAGAAGATAACGAGAAAAAAG  |
| ChIP-PYK10-A-R  | GTTTTACACCATGCCAAATTG  |
| ChIP-PYK10-B-F  | TACACAAACAGCCTTCTTTC   |

|                 |                        |
|-----------------|------------------------|
| ChIP-PYK10-B-R  | CCAAAACGTGTACATCCGCTC  |
| ChIP-PYK10-C-F  | TGTGGGTGCGAGTTCCACATC  |
| ChIP-PYK10-C-R  | TGCAGTGGCGAGTCCAAAAAC  |
| ChIP-PYK10-D-F  | ACGAAGTGTACCAACAACCTTG |
| ChIP-PYK10-D-R  | CTAAGCCGAGCGCATGCGTAAC |
| ChIP-PYK10-E-F  | ATTTGGTCCCCAACAGTCGAAA |
| ChIP-PYK10-E-R  | CTGTAGTACTGAATAAATCTT  |
| ChIP-PYK10-F-F  | TTTAATATTGTTTTGACTTTTT |
| ChIP-PYK10-F-R  | TAAGACATGTCTATCAGATAA  |
| ChIP-PYK10-G-F  | ATTGGGAAATATGCTCTAAGA  |
| ChIP-PYK10-G-R  | GTATAATACTATCTCGTGTTT  |
| ChIP-PYK10-H-F  | TCCATTCTTTCATTATCGGAG  |
| ChIP-PYK10-H-R  | TAGTAATATCCAGTAATACCA  |
| ChIP-PYK10-I-F  | AATAAAATAATCATATAAATT  |
| ChIP-PYK10-I-R  | TATTGTTTCTTTACCTTTTTA  |
| ChIP-PYK10-J-F  | TACAACCTATAACGTCAATAT  |
| ChIP-PYK10-J-R  | TTTTACATATCGAAGACGTTT  |
| ChIP-BGLU28-A-F | GGCTCTGAATTTTTTTATTTTC |
| ChIP-BGLU28-A-R | GTTTGATACAAATTCTGCTTG  |
| ChIP-BGLU28-B-F | TTTTCTTGTGTATCAAACAAA  |
| ChIP-BGLU28-B-R | GTAGTAGTAACTTAGAAATTA  |
| ChIP-BGLU28-C-F | AATATTATTCTCTACGACCC   |
| ChIP-BGLU28-C-R | GTCTTTGGATCAGATTCAGG   |
| ChIP-BGLU28-D-F | TTATGCACGGTTTGATGTAAG  |
| ChIP-BGLU28-D-R | GAATGAGAATGAGTTTGTTGC  |
| ChIP-BGLU28-E-F | ATTCTCTTAATCAAATGATT   |
| ChIP-BGLU28-E-R | TAGCCCATTAAGATAATGTTT  |
| ChIP-BGLU28-F-F | AGCTTTCCCAATTTGACCATG  |
| ChIP-BGLU28-F-R | GTATGATTTACAAGCAGGCG   |
| ChIP-BGLU28-G-F | AGGAATGAATTTAAGTATTTT  |
| ChIP-BGLU28-G-R | ATGACATCAAAGATTAATTCC  |
| ChIP-BGLU28-H-F | TTCCTTGTGGAATCGGAATTG  |
| ChIP-BGLU28-H-R | ATTACAATCCAAACCCTTTTTG |
| ChIP-BGLU28-I-F | GACACACACTTATTTCTATAG  |
| ChIP-BGLU28-I-R | TAACCTAATTAACATTAAC    |
| ChIP-BGLU30-A-F | AAATTAATTCAACGTTTAGTG  |
| ChIP-BGLU30-A-R | TTAATCGAGTATTATTAGCTC  |
| ChIP-BGLU30-B-F | AAAGATATTTTTTGACTTTC   |
| ChIP-BGLU30-B-R | TTTAGTAAATTATACATTTT   |
| ChIP-BGLU30-C-F | AGGGAGGGACAAGACAAAAAA  |

|                       |                                      |                                                               |
|-----------------------|--------------------------------------|---------------------------------------------------------------|
| ChIP-BGLU30-C-R       | GAGTGCAGATTTTGTATGGAAG               |                                                               |
| ChIP-BGLU30-D-F       | AGTAAAAAGAAATTATGTATTG               |                                                               |
| ChIP-BGLU30-D-R       | CAATACTACCCCTCTGTAAATT               |                                                               |
| ChIP-BGLU30-E-F       | GATTCTAGAAACCTAAGAATA                |                                                               |
| ChIP-BGLU30-E-R       | ACTAAATTTATTTTTATTTTAT               |                                                               |
| ChIP-BGLU30-F-F       | AATAGTATAATTAATATATGTA               |                                                               |
| ChIP-BGLU30-F-R       | GATTTTAATTGCTTAGAAACA                |                                                               |
| ChIP-BGLU30-G-F       | TTATCAAAACTTCATTGCCC                 |                                                               |
| ChIP-BGLU30-G-R       | ATTTGTGTGTAAAGTAATGTT                |                                                               |
| ChIP-BGLU30-H-F       | ATATGATTATATATACATATG                |                                                               |
| ChIP-BGLU30-H-R       | CATAAGATTTCTTTCCAAGG                 |                                                               |
| FAMA-nLuc-BamHI-F     | CGGggtaccATGGATAAAGATTACTCGG<br>CAC  | Firefly<br>luciferase<br>complementati<br>on imaging<br>assay |
| FAMA-nLuc-Sall-R      | ACGCgtcgacTCAAGTAAACACAATATT<br>TCCC |                                                               |
| cLuc-JAZI-BamHI-F     | CGGggtaccATGTTCGAGTTCTATGGAAT<br>G   |                                                               |
| cLuc-JAZI-PstI-R      | AActgcagTCATATTTTCAGCTGCTAAAC        |                                                               |
| cLuc-JAZ9-BamHI-F     | CGGggtaccATGGAAAGAGATTTTCTGG<br>G    |                                                               |
| cLuc-JAZ9-PstI-R      | AActgcagTTATGTAGGAGAAGTAGAAG         |                                                               |
| TGGIPro-LUC-HindIII-F | CCCaagettAGAAGGATAGAATTATGTTT<br>TG  |                                                               |
| TGGIPro-LUC-PstI-R    | TAActgcagGGTTTATTAGTAGTGTGTAT<br>G   |                                                               |
| pMAL-C2X-FAMA-BamHI-F | CGggtaccATGGATAAAGATTACTCGGC         | Protein<br>purification                                       |
| pMAL-C2X-FAMA-PstI-R  | GCctgcagTCAAGTAAACACAATATTTTC        |                                                               |
| pET32a-JAZI-Sall-F    | GCctgcagATGTTCGAGTTCTATGGAATG        |                                                               |
| pET32a-JAZI-XhoI-R    | CCGctgcagTCATATTTTCAGCTGCTAAAC       |                                                               |
